# Supplementary material for: Prediction of causative genes in inherited retinal disorder from fundus photography and autofluorescence imaging using deep learning techniques
Source: HighWire-hosted journal article supplement (doi:10.1136/bjophthalmol-2020-318544), 2021-04-20
Supplement: bjophthalmol-2020-318544supp002_data_supplement.pdf [file bjophthalmol-2020-318544supp002_data_supplement.pdf]

## Supplemental Figure 2: The detailed filtration/selection flow of the examined images

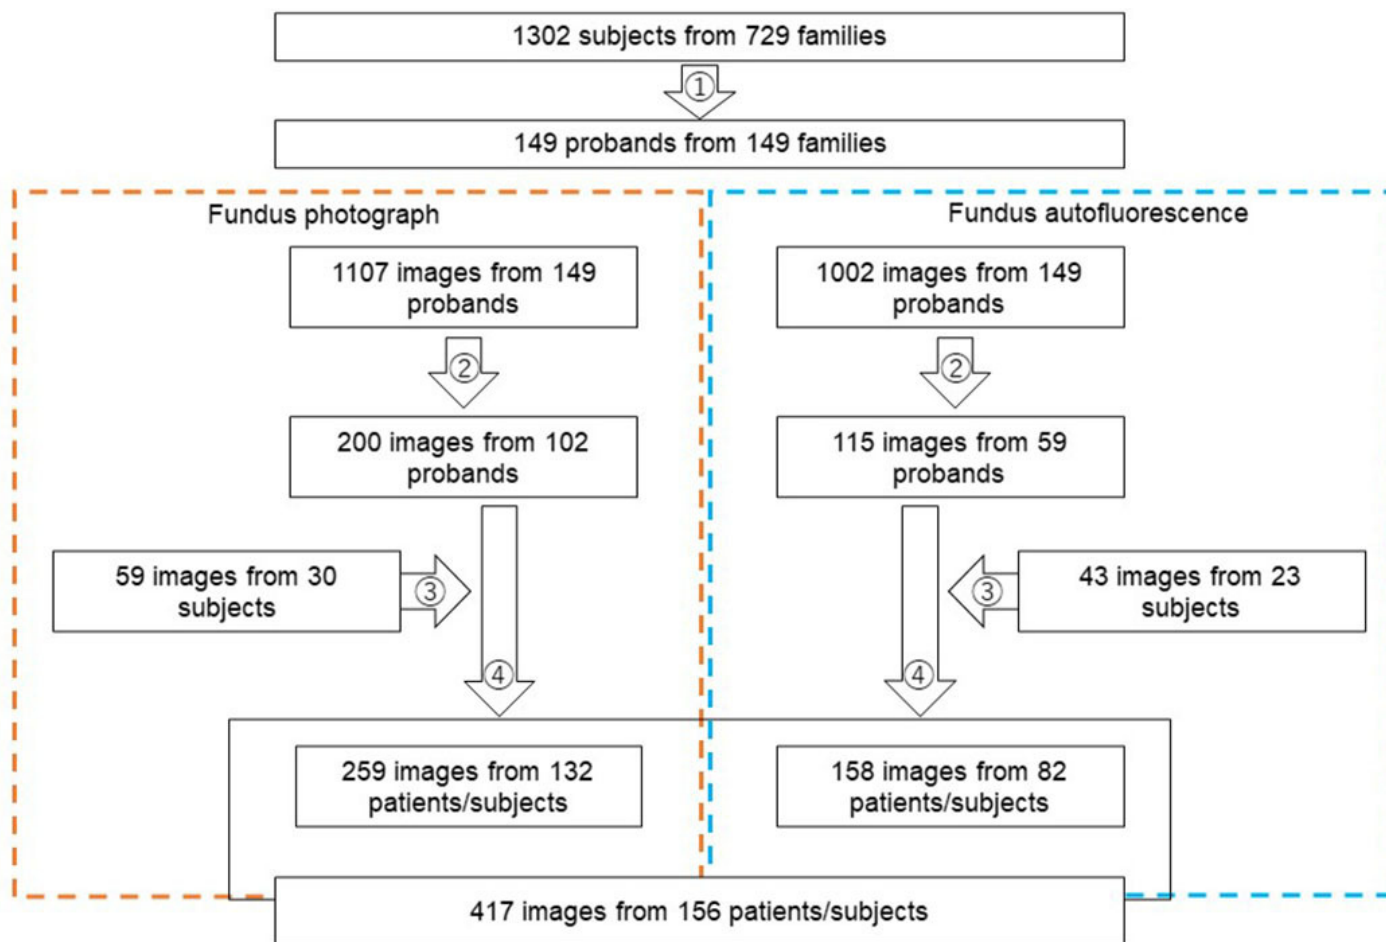

The filtration/selection process include ① selecting three genes (*ABCA4*, *EYS*, *RP11L1*) based on the disease prevalence, ② selecting one image from one eye by an expert, ③ selecting normal images by an expert (excluding images with inadequate dataset/quality), and ④ fixing the dataset for machine learning.
