# Supplementary material for: Prediction of causative genes in inherited retinal disorder from fundus photography and autofluorescence imaging using deep learning techniques
Source: HighWire-hosted journal article supplement (doi:10.1136/bjophthalmol-2020-318544), 2021-04-20
Supplement: bjophthalmol-2020-318544supp003_data_supplement.pdf [file bjophthalmol-2020-318544supp003_data_supplement.pdf]

**Supplemental Table 1. Summary of training accuracy results based on fundus photography**

| Trial 1.     | Accuracy | Sensitivity | Specificity |
|--------------|----------|-------------|-------------|
| <i>ABCA4</i> | -        | 100%        | 96%         |
| <i>EYS</i>   | -        | 91%         | 100%        |
| <i>RP1L1</i> | -        | 94%         | 92%         |
| Normal       | -        | 73%         | 98%         |
| Total        | 89%      | 90%         | 96%         |
| Trial 2.     | Accuracy | Sensitivity | Specificity |
| <i>ABCA4</i> | -        | 75%         | 100%        |
| <i>EYS</i>   | -        | 100%        | 95%         |
| <i>RP1L1</i> | -        | 94%         | 92%         |
| Normal       | -        | 73%         | 98%         |
| Total        | 88%      | 100%        | 100%        |
| Trial 3.     | Accuracy | Sensitivity | Specificity |
| <i>ABCA4</i> | -        | 100%        | 100%        |
| <i>EYS</i>   | -        | 100%        | 100%        |
| <i>RP1L1</i> | -        | 100%        | 96%         |
| Normal       | -        | 88%         | 100%        |
| Total        | 97%      | 97%         | 99%         |
| Trial 4.     | Accuracy | Sensitivity | Specificity |
| <i>ABCA4</i> | -        | 78%         | 96%         |
| <i>EYS</i>   | -        | 100%        | 95%         |
| <i>RP1L1</i> | -        | 100%        | 100%        |
| Normal       | -        | 87%         | 100%        |
| Total        | 94%      | 91%         | 98%         |

Evaluations were conducted with a randomised 4-fold cross-validation method, and the accuracy of concordance (aimed >80%) between the genetic diagnosis and the machine diagnosis was calculated through the training to the fixed application program interface (API) for further testing.
